# Supplementary figures and images for: Depicting the Core Transcriptome Modulating Multiple Abiotic Stresses Responses in Sesame (Sesamum indicum L.)
Source: MDPI journal article supplement (doi:10.3390/ijms20163930), 2019-08-13

sbheatmap

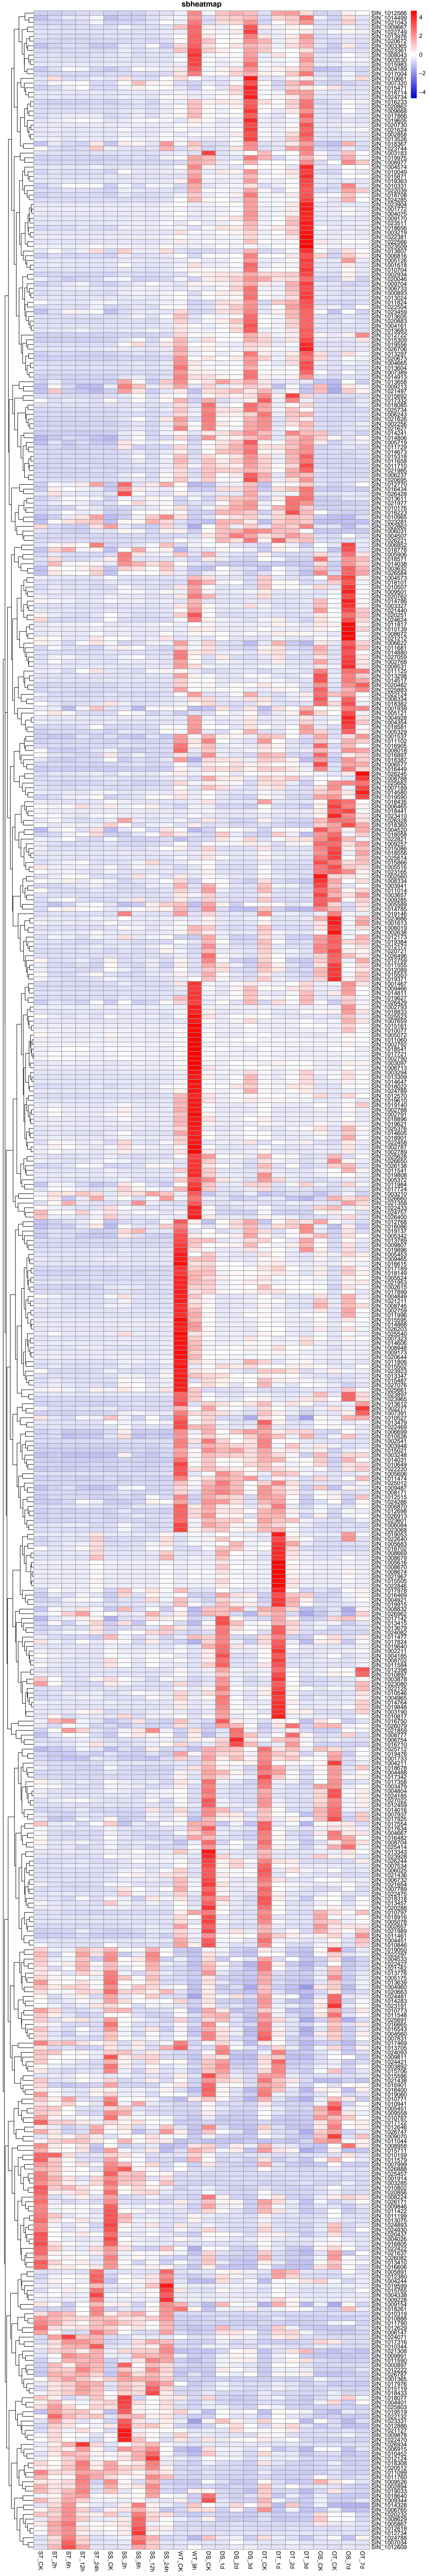

Supplement: s1 [file s1]
